# Supplementary figures and images for: Impact of Time Point of Extracorporeal Membrane Oxygenation on Mortality and Morbidity in Congenital Diaphragmatic Hernia: A Single-Center Case Series
Source: MDPI journal article supplement (doi:10.3390/children9070986), 2022-07-01

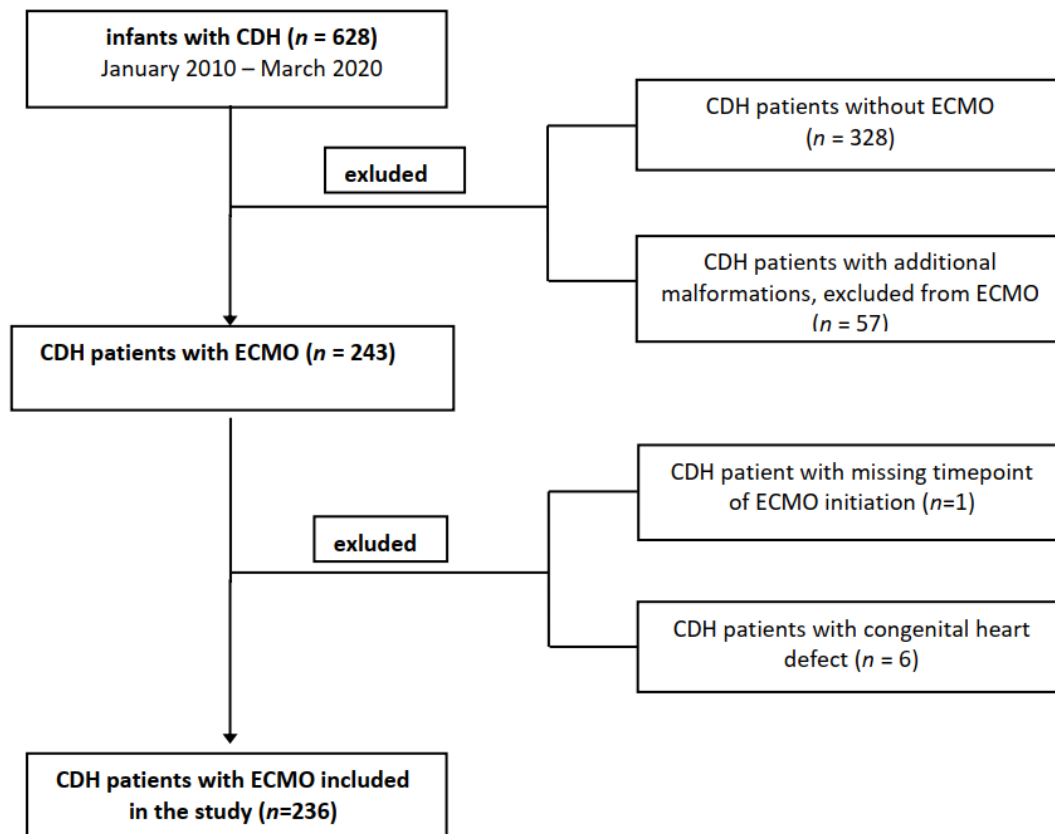

Figure S1. Recruitment of study population.

Supplement: s1 [file s1]
